# Supplementary material for: In-plane oriented highly ordered lamellar structure formation of poly(N-dodecylacrylamide) induced by humid annealing
Source: Royal Society of Chemistry journal article supplement (doi:10.1039/c6ra27994e), 2017-01-01
Supplement: c6ra27994e1.pdf [file c6ra27994e1.pdf]

# In-plane oriented highly ordered lamellar structure formation of poly(*N*-dodecylacrylamide) induced by humid annealing

Yuki Hashimoto,<sup>†</sup> Takuma Sato,<sup>†</sup> Ryosuke Goto,<sup>//</sup> Yuki Nagao,<sup>‡</sup> Masaya Mitsuishi,<sup>§</sup> Shusaku Nagano,<sup>//</sup> and Jun Matsui<sup>⊥,\*</sup>

<sup>†</sup>Graduate School of Science and Engineering, Yamagata University, 1-4-12 Kojirakawa-machi, Yamagata 990-8560, Japan

<sup>//</sup>School of Materials Science, Japan Advanced Institute of Science and Technology, 1-1 Asahidai, Nomi, Ishikawa 923-1292, Japan

<sup>‡</sup>Institute for Multidisciplinary Research for Advanced Materials, Tohoku University, 2-1-1 Katahira, Aoba-ku, Sendai 980-8577, Japan

<sup>§</sup>Nagoya University Venture Business Laboratory, Nagoya University, Furo-cho, Chikusa, Nagoya 464-8603, Japan

<sup>⊥</sup>Department of Material and Biological Chemistry, Yamagata University, 1-4-12 Kojirakawa-machi, Yamagata 990-8560, Japan

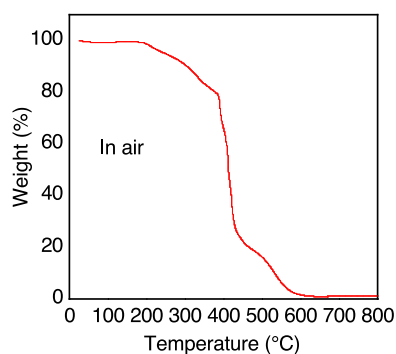

**Figure S1.** TGA thermogram of pDDA.

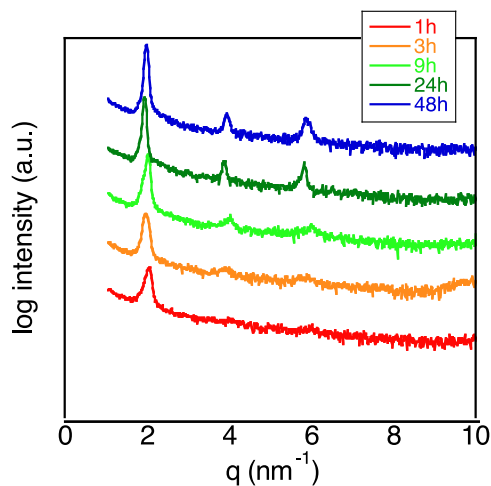

**Figure S2.** XRD pattern of pDDA film humidified under 98% RH, 60 °C at different time.

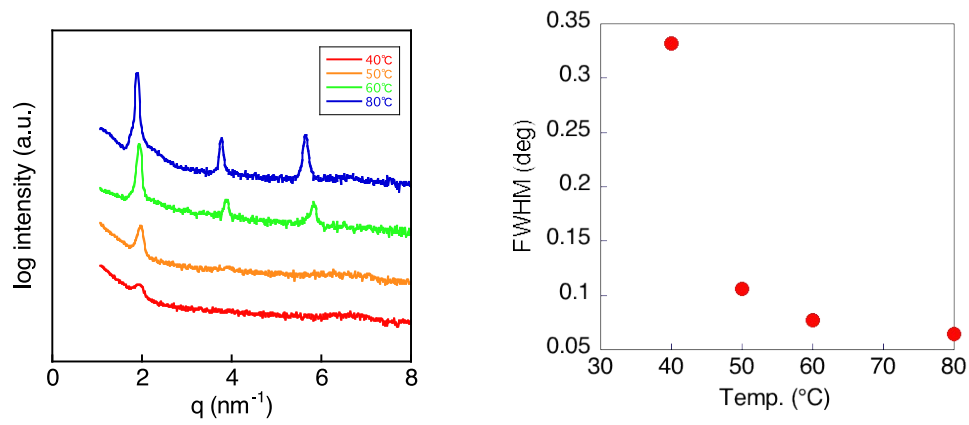

**Figure S3.** (a) XRD pattern and (b) FWHM values of the first peak of pDDA film humidified at 98% for 24 h at different temperatures.

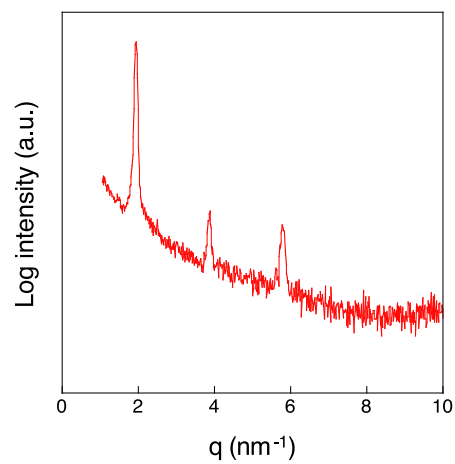

**Figure S4.** XRD pattern of humidified annealed pDDA film on a hydrophilic silicon substrate.

The film was annealed at 98% RH, 60 °C for 24 h.

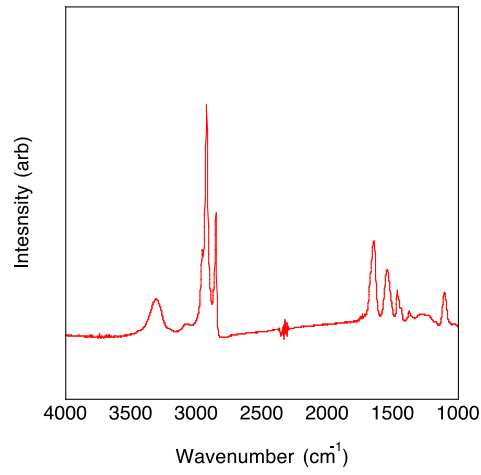

**Figure S5** FT-IR spectrum of as cast pDDA film

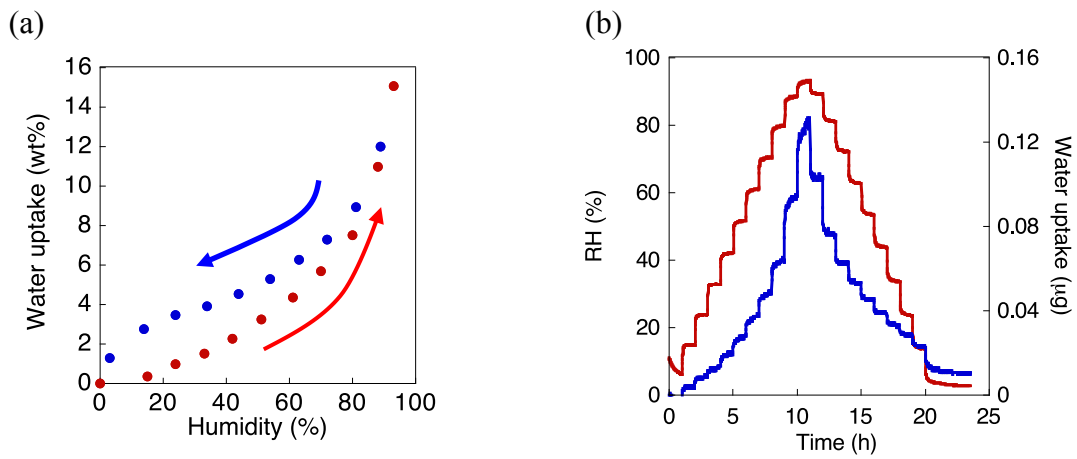

**Figure S6** (a) Water uptake amount of pDDA with different humidity. Red circle absorption and blue circle desorption process. (b) Water uptake dynamics of pDDA film. Dotted red line: change of humidity with time. Solid blue line: change of water uptake with time. The measurement is carried out at 25 °C.
